# Supplementary material
Source: PubMed Central journal article supplement (PMC5499510)
Supplement: NIHMS872397-supplement-supplement_1.pdf [file NIHMS872397-supplement-supplement_1.pdf]

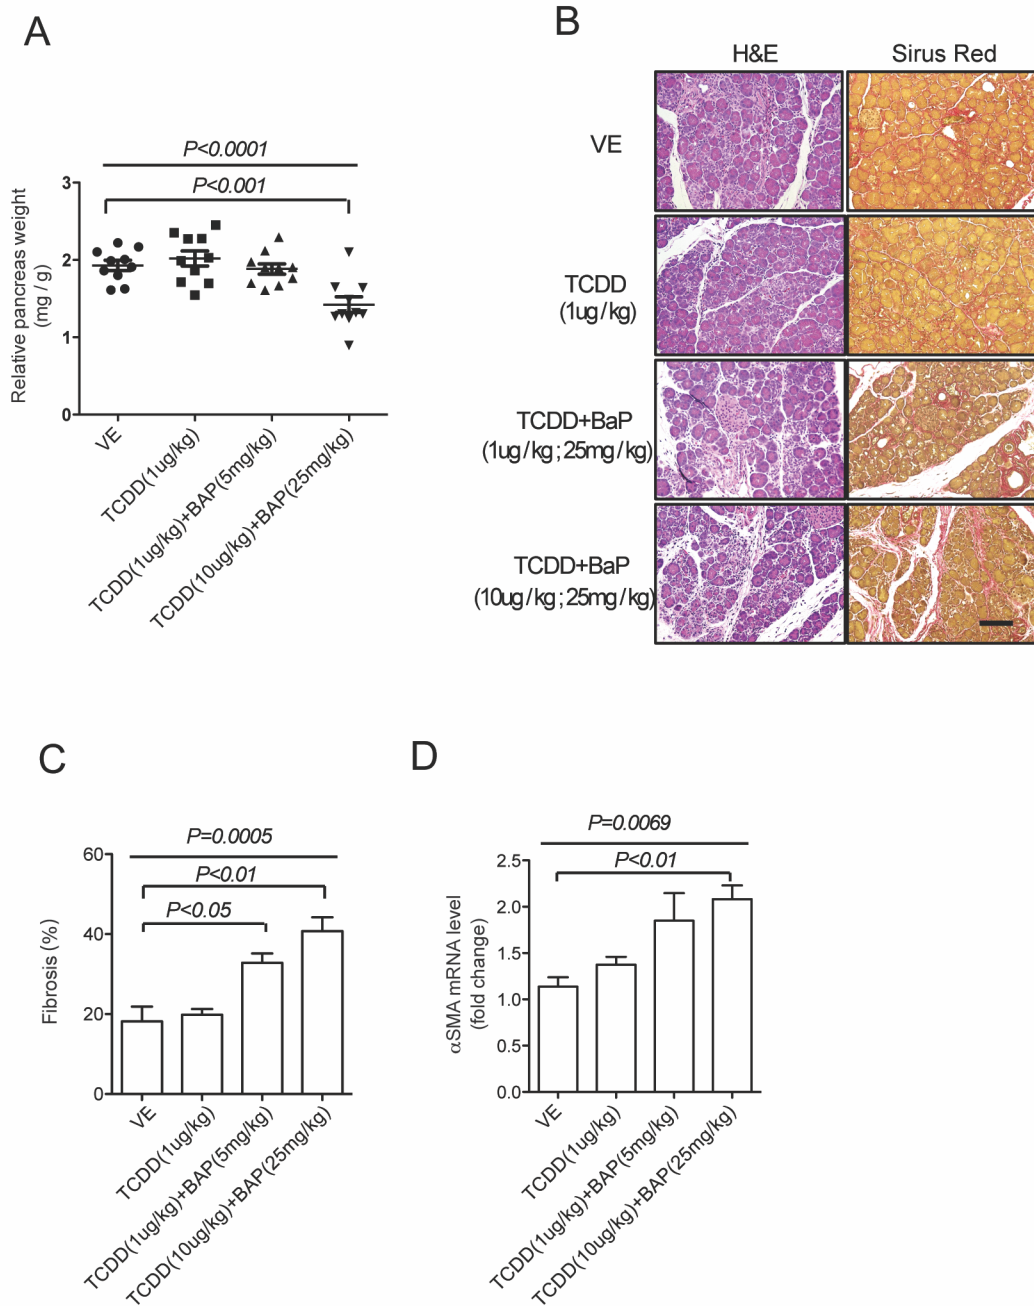

**FigureS1. AhR ligands in cigarette smoke have additive effect in promoting fibrosis.** Vehicle (VE) or indicated doses of AhR ligands were administrated to Balb/c mice right after starting CP induction with caerulein. Mice were euthanized and tissues were harvested after 4 weeks of caerulein injection. (A) Relative pancreas weights from indicated groups are shown (B) Representative of pancreas H&E and Sirius Red staining. Scale bar, 100 $\mu$ m. (C) Quantitated fibrotic areas are shown as bar graph. (D) Quantitative RT-PCR analysis of  $\alpha$ SMA ( $\alpha$ -SMA) gene expression in the pancreas from indicated group (n=10 per group pooled from 2 independent experiments, mean  $\pm$  SEM, one-way ANOVA, Tukey's *post hoc* test).

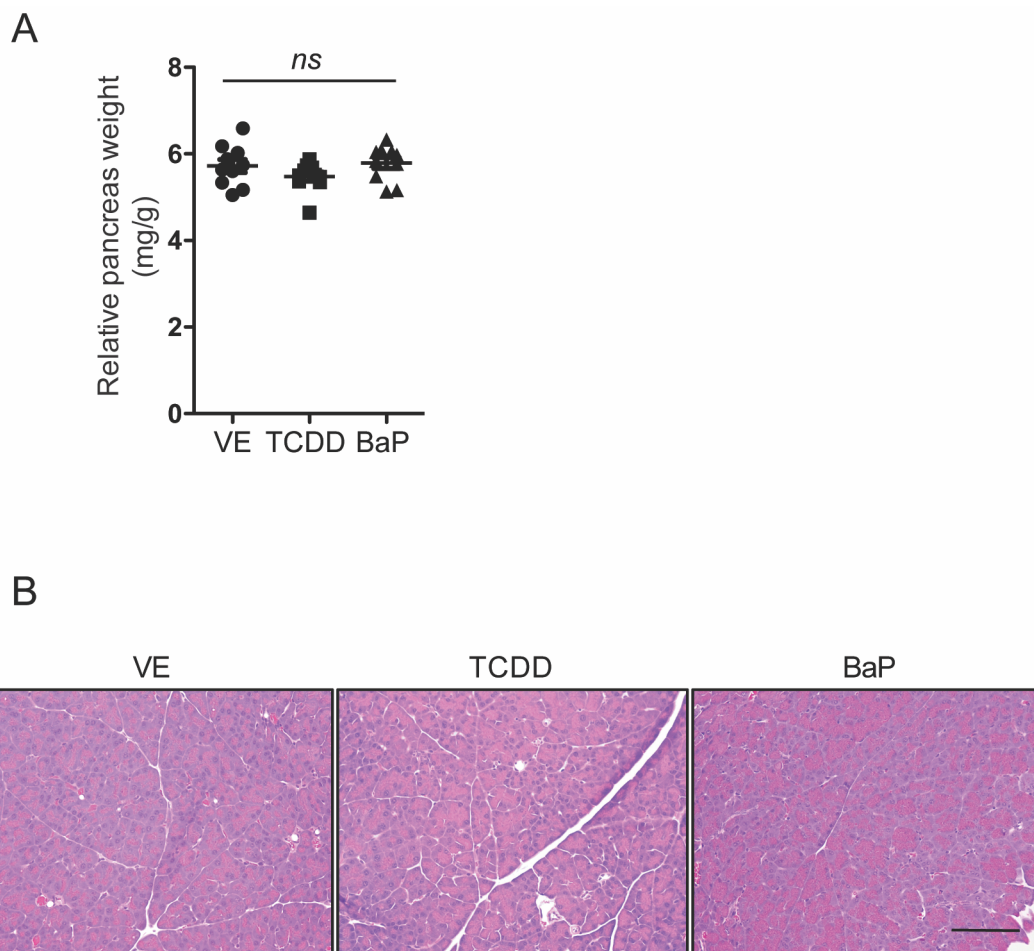

**FigureS2. The effect of AhR ligands in control mice.** (A) Vehicle (VE) or TCDD (10 $\mu$ g/kg, once per week) or BaP (25mg/kg, daily) was administered to Balb/c mice treated with saline instead of caerulein for 4 weeks before harvested. Relative pancreas weights from indicated groups are shown (n=10 per group pooled from 2 independent experiments, mean  $\pm$  SEM, one-way ANOVA test). (B) Representative of pancreas H&E staining shown. Scale bar, 100 $\mu$ m.

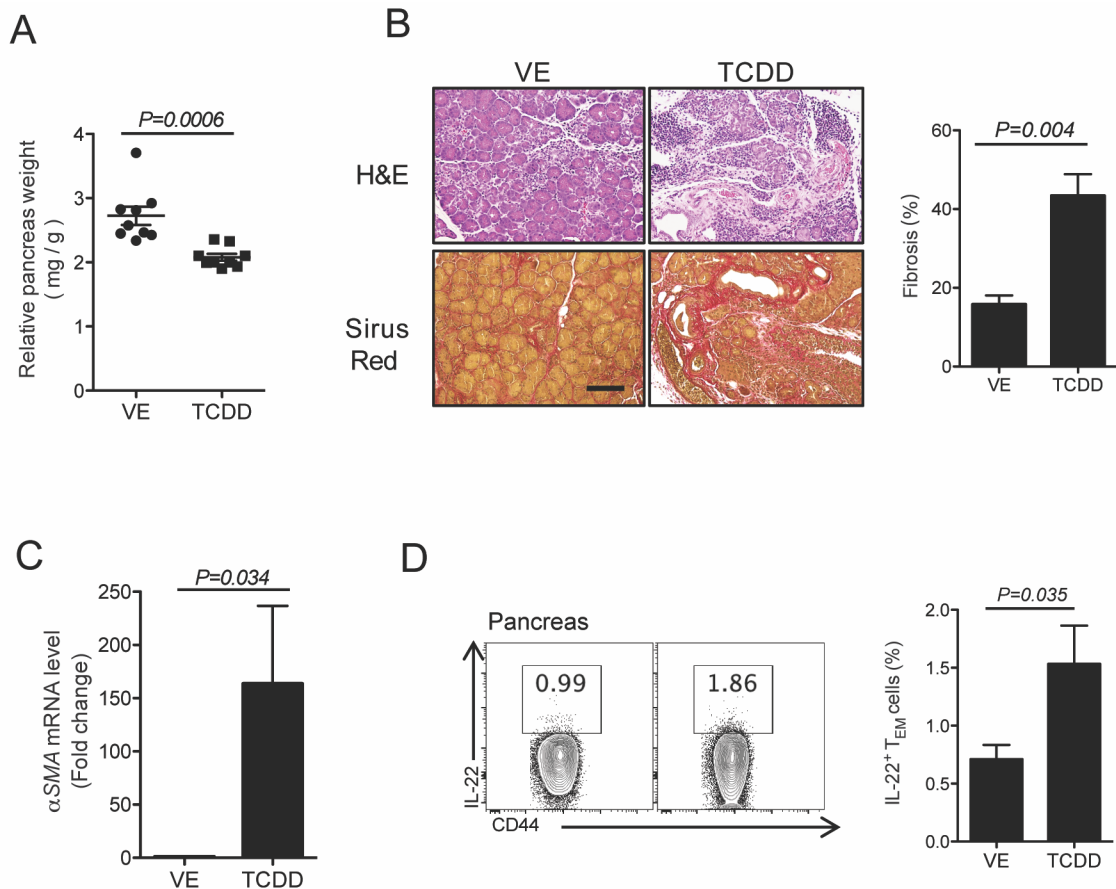

**FigureS3. TCDD worsens fibrosis in Caerulein plus lipopolysaccharide (LPS) model of chronic pancreatitis.** Balb/c mice were injected with caerulein (50 $\mu$ g/kg, 6 times/day, 3 times/week) and LPS (3mg/kg, once per week) to induce chronic pancreatitis. Vehicle (VE) or TCDD (10 $\mu$ g/kg, once per week) was administered to mice right after starting CP induction, and mice were euthanized and tissues were harvested after 4 weeks of caerulein+ LPS injection. (A) Relative pancreas weights from indicated groups are shown (n=9 per group pooled from 2 independent experiments, mean  $\pm$  SEM, unpaired two-tailed Student's *t*-test). (B) Representative of pancreas H&E and Sirius Red staining are shown. Scale bar, 100 $\mu$ m. Quantitated fibrotic areas are shown as bar graph. Mean  $\pm$  SEM. (C) Quantitative RT-PCR analysis of  $\alpha$ SMA ( $\alpha$ -SMA gene expression in the pancreas from VE- or TCDD-treated mice (mean  $\pm$  SEM, unpaired one-tailed Student's *t*-test). (D) Frequency of IL-22<sup>+</sup> T<sub>EM</sub> (Effector/Memory, CD4<sup>+</sup>CD44<sup>hi</sup>CD45RB<sup>low</sup>) cells in VE- or TCDD-treated mice, at 4 weeks of CP induction (mean  $\pm$  SEM, unpaired two-tailed Student's *t*-test).

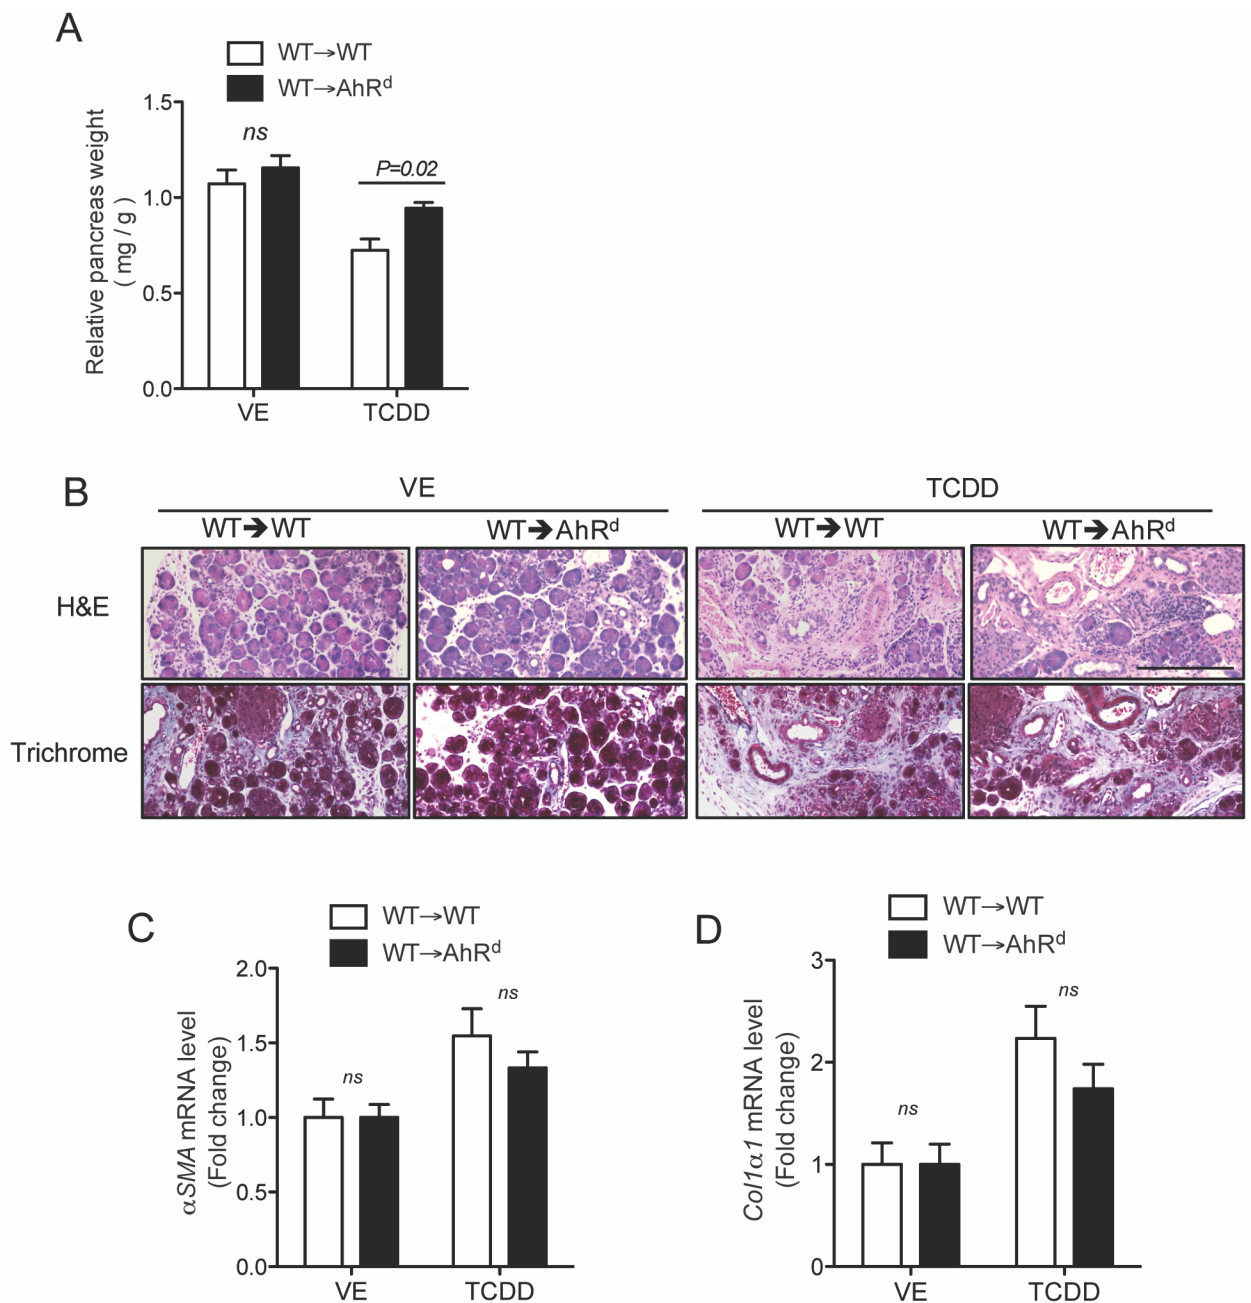

**FigureS4. Leukocytes are major contributors to AhR-mediated fibrosis in chronic pancreatitis.** Wild-type (WT) or AhR<sup>d</sup> mice were lethally irradiated and reconstituted with bone marrow (BM) cells from WT mice and engrafted over 8 weeks. Vehicle (VE) or AhR ligand (TCDD, 10µg/kg, once per week) was administered to indicated mice right after start of CP induction, mice were then euthanized and tissues harvested after 4 weeks of caerulein injections. (A) Relative pancreas weights from indicated groups are shown (n=5 per group pooled from 2 independent experiments, mean ± SEM, unpaired two-tailed Student's *t*-test). (B) Representative of pancreas H&E and Trichrome staining. Scale bar, 200µm. (C,D) Quantitative RT-PCR analysis of fibrosis-associated genes  $\alpha$ SMA ( $\alpha$ -SMA) and *Col1 $\alpha$ 1* (Collagen1A1) in the pancreas from indicated mice treated with VE or TCDD (means ± SEM, unpaired one-tailed Student's *t*-test).

Gated on CD4<sup>+</sup>CD44<sup>hi</sup>CD45RB<sup>low</sup>

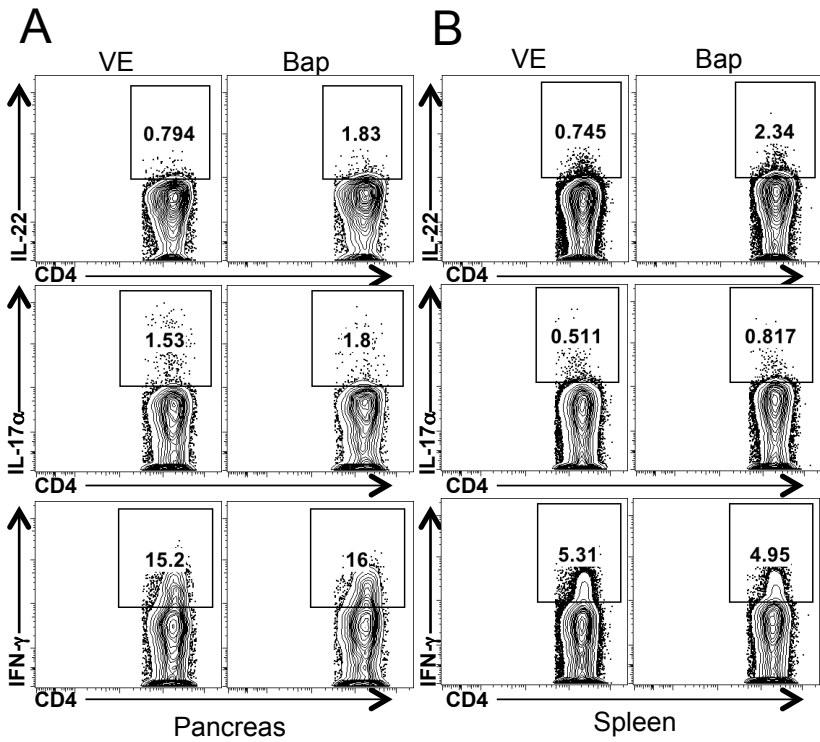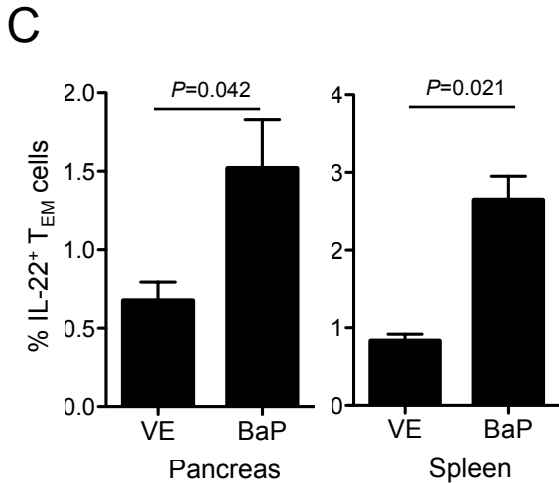

**FigureS5. Benzo[a]pyrene (BaP) induces IL-22<sup>+</sup> T cells in the pancreas and spleen during chronic pancreatitis.** Vehicle (VE) or Benzo[a]pyrene (BaP, 25mg/kg, daily) was orally administrated to WT mice undergoing CP induction, and mice were harvested after 4 weeks of caerulein injection. Frequency of IL-22<sup>+</sup>, IL-17 $\alpha$ <sup>+</sup> and IFN $\gamma$ <sup>+</sup> T<sub>EM</sub> (Effector/Memory, CD4<sup>+</sup>CD44<sup>hi</sup>CD45RB<sup>low</sup>) cells among pancreatic leukocytes (A) or splenocytes (B) from VE- or BaP-treated mice, 4 weeks after CP induction. Data are representative of 2 independent experiments. (C) Bar graphs show % IL-22<sup>+</sup> T<sub>EM</sub> cells in the pancreas and spleen (n=10 per group pooled from 2 independent experiments, mean  $\pm$  SEM, unpaired two-tailed Student's *t*-test).

A

Mouse primary PSCs

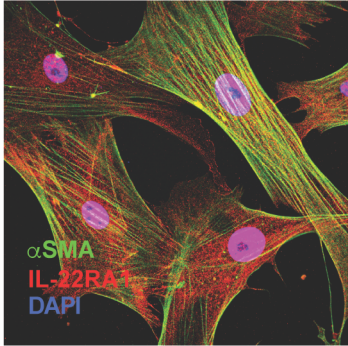

B

Human primary PSCs

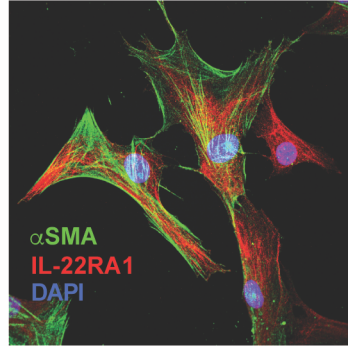

**FigureS6. IL-22RA1 expression on primary mouse and human pancreatic stellate cells.** Mouse (A) and human (B) primary pancreatic stellate cells were isolated and cultured for about 2 weeks, and immunofluorescence staining of IL-22RA1 (red),  $\alpha$ -SMA (green), and nuclei (blue) are shown.

## Supplementary Table 1.

|                                           | Chronic Pancreatitis     |                     |                        | Healthy Controls<br>(N=11) |
|-------------------------------------------|--------------------------|---------------------|------------------------|----------------------------|
|                                           | Current Smokers (N = 10) | Ex-Smokers (N = 11) | Never Smokers (N = 18) |                            |
| <b>Demographics</b>                       |                          |                     |                        |                            |
| Mean Age (SD)                             | 51 (±16)                 | 59 (±17)            | 51 (±17)               | 50 (±16)                   |
| Male (%)/Female (%)                       | 5 (50%)/5 (50%)          | 7 (64%)/ 4 (36%)    | 9 (50%)/9 (50%)        | 8 (73%)/ 3 (27%)           |
| <b>Clinical History</b>                   |                          |                     |                        |                            |
| Positive CT/MR/EUS for CP (%)*            | 10 (100%)                | 10 (91%)            | 18 (100%)              | N/A                        |
| Exocrine Insufficiency (%)**              | 5 (50%)                  | 5 (45%)             | 7 (39%)                | N/A                        |
| Endocrine Insufficiency (%)+              | 6 (60%)                  | 1 (9%)              | 4 (22%)                | N/A                        |
| <b>Smoking History</b>                    |                          |                     |                        |                            |
| Average Pack Years (SD)                   | 22 (±29)                 | 24 (±23)            | N/A                    | N/A                        |
| Average Years Since Last Tobacco Use (SD) | N/A                      | 18 (±14)            | N/A                    | N/A                        |

\*Pancreatic calcifications, atrophy, or lobularity of tissue, \*\*Positive fecal elastase, secretin function, or 72 hour fecal fat collection, + Diabetes Mellitus



**A**

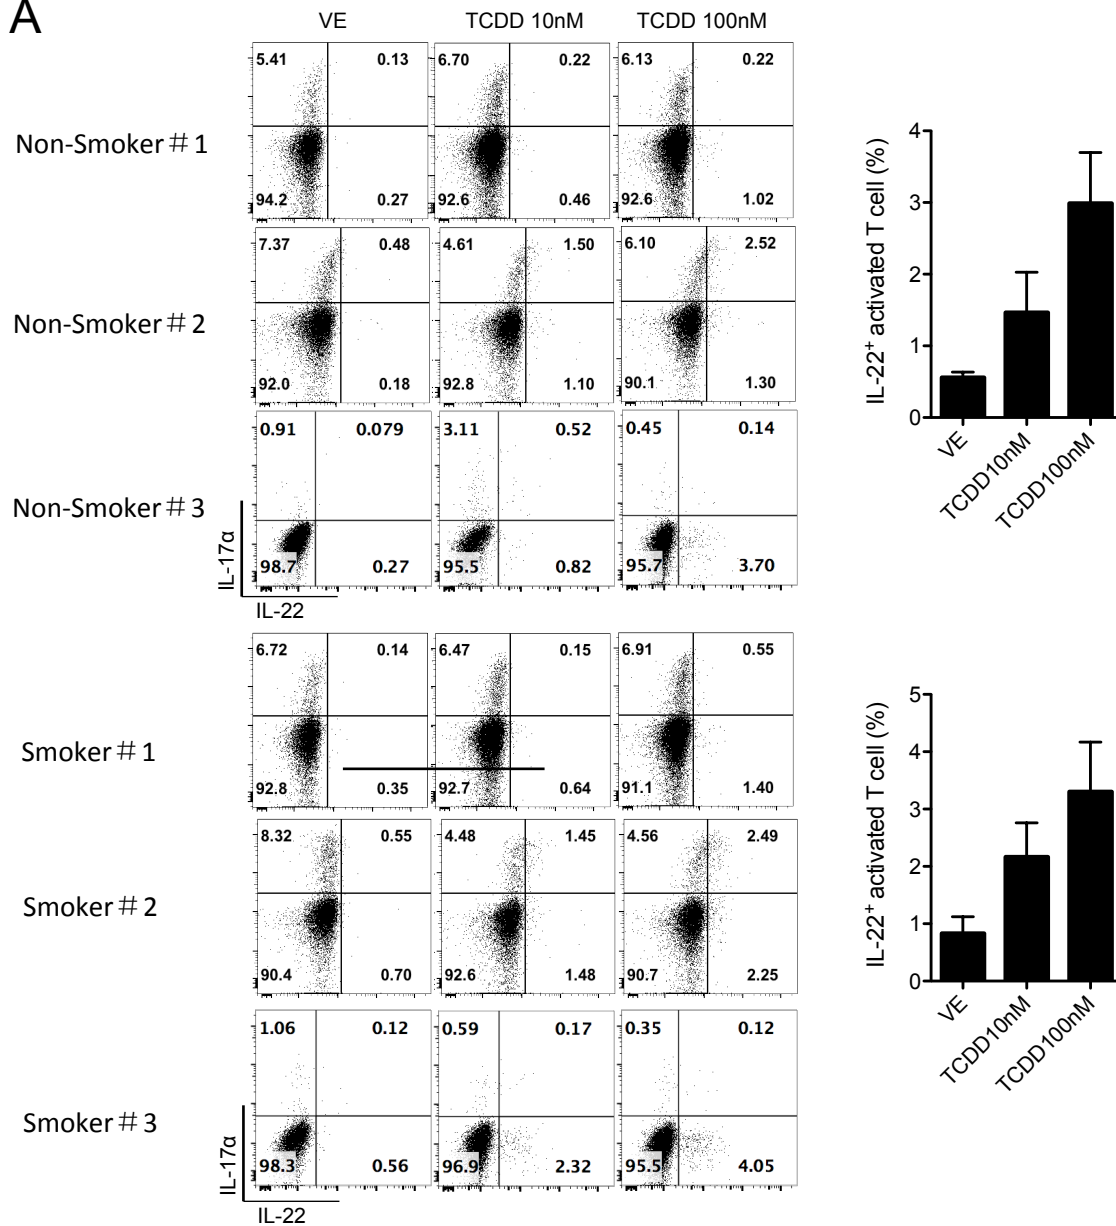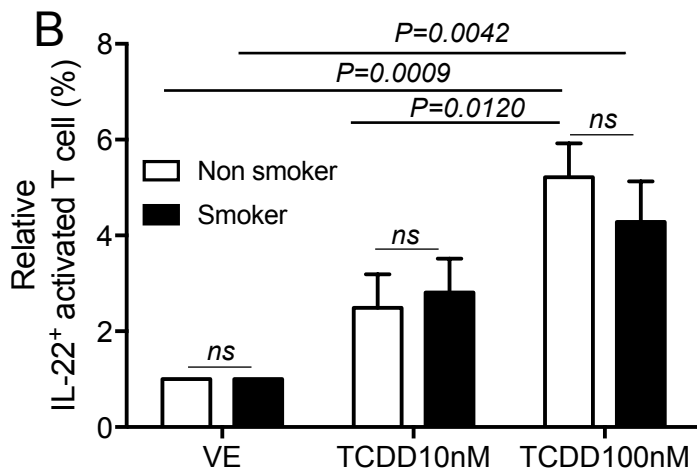

**FigureS7. Similar IL-22 induction by CD4<sup>+</sup> T cells isolated from smoker and non-smoker blood.** Total CD4<sup>+</sup> T cells were enriched from smokers and non-smokers blood (not buffy coat) and activated with anti-CD3 and -CD28 in the presence of TCDD for 5 days. (A) Flow cytometry plots show frequency of IL-17α and IL-22 expression in activated CD4<sup>+</sup> T cells and frequency of IL-22<sup>+</sup> activated T cells shown in the bar graphs. (B) Bar graph shows frequency of IL-22<sup>+</sup> activated T cells relative to VE control (n=3 from each group run as 3 independent experiments, mean ± SEM, two-way ANOVA with Bonferroni *post hoc* test).



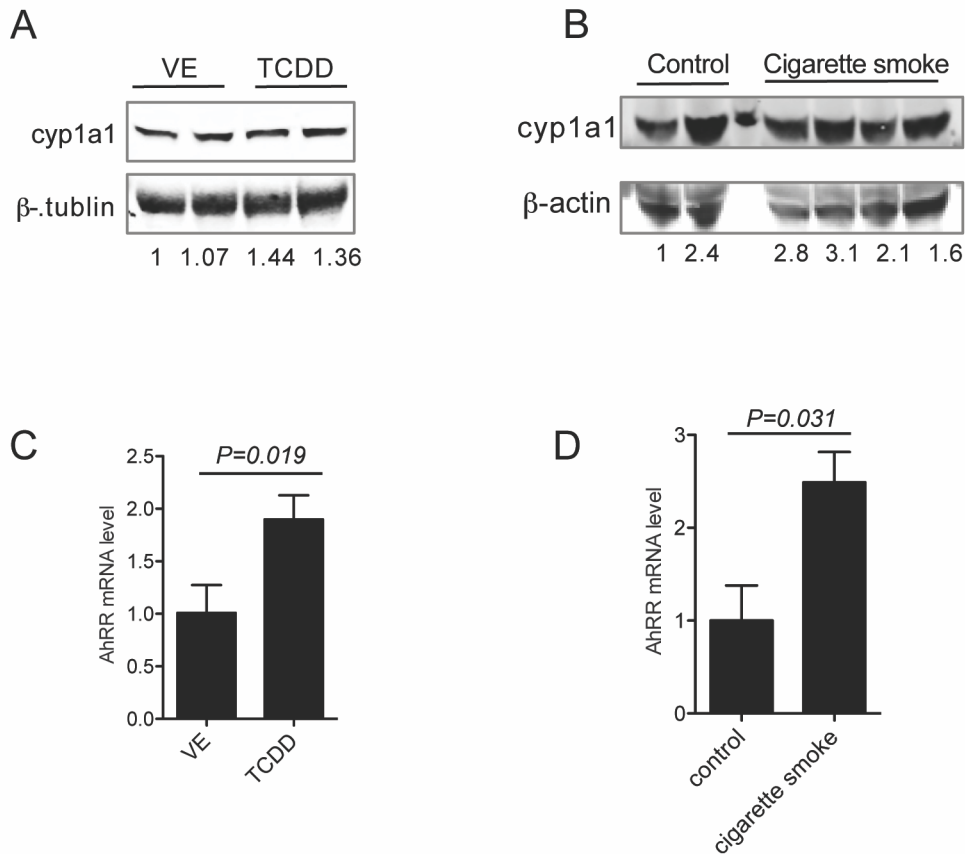

**FigureS8. TCDD and cigarette smoke up regulate comparable Cyp1a1 and AhRR expression in the pancreas.** (A) Balb/c mice were treated with VE or TCDD (10 $\mu$ g/kg, once per week) for 4 week before harvesting the pancreas. Pancreatic Cyp1a1 and  $\beta$ -tubulin level were determined by immunoblotting, and number below the blot indicate relative intensity. (B) Mice were exposed to fresh air (control) or cigarette smoke for 6 hours per day, 5 days per week for duration of 7 weeks before euthanasia as reported previously<sup>15</sup>. Pancreatic Cyp1a1 and  $\beta$ -actin level were determined by immunoblotting, and number below the blot indicate relative intensity. (C) Pancreatic *AhRR* mRNA expression from VE or TCDD-treated mice was determined by qPCR assay (mean  $\pm$  SEM, n=10 per group, unpaired two-tailed Student's t-test). (D) Pancreatic *AhRR* mRNA expression from control or cigarette smoke exposed mice were determined by qPCR assay (mean  $\pm$  SEM, n=3 control and n=4 cigarette smoke exposed mice, unpaired two-tailed Student's t-test).
